# Supplementary material
Source: PubMed Central journal article supplement (PMC6146410)
Supplement: NIHMS981335-supplement-supplement_1.pdf [file NIHMS981335-supplement-supplement_1.pdf]

Table S1. Adolescent Girls' Self Esteem, Depression, and Perceived Maltreatment by Others as Mediators between Adolescent Baseline Obesity Status and Adult Economic and Social Outcomes\*

|                                                        | Baseline Obesity<br>->Mediator |       |       | Outcomes at EAT-IV            |       |       |                   |       |       |                                        |       |       |
|--------------------------------------------------------|--------------------------------|-------|-------|-------------------------------|-------|-------|-------------------|-------|-------|----------------------------------------|-------|-------|
|                                                        |                                |       |       | Education (Bachelor's degree) |       |       | Married/Partnered |       |       | Household Income (≥ \$50,000 Annually) |       |       |
|                                                        |                                |       |       | Coeff                         | SE    | p     | Coeff             | SE    | p     | Coeff                                  | SE    | p     |
| Self Esteem (EAT-I)                                    |                                |       |       |                               |       |       |                   |       |       |                                        |       |       |
| α (Obese->Mediator)                                    | -1.097                         | 0.406 | 0.007 |                               |       |       |                   |       |       |                                        |       |       |
| β (Mediator->Outcome)                                  |                                |       |       | 0.031                         | 0.012 | 0.012 | 0.014             | 0.013 | 0.297 | 0.039                                  | 0.012 | 0.001 |
| Indirect effect                                        |                                |       |       | -0.034                        | 0.021 | 0.107 | -0.015            | 0.016 | 0.346 | -0.043                                 | 0.022 | 0.048 |
| <u>Proportion of effect mediated</u>                   |                                |       |       | 0.051                         | 0.034 |       | 0.031             | 0.034 |       | 0.124                                  | 0.652 |       |
| Self Esteem (EAT-II)                                   |                                |       |       |                               |       |       |                   |       |       |                                        |       |       |
| α (Obese->Mediator)                                    | -0.755                         | 0.407 | 0.064 |                               |       |       |                   |       |       |                                        |       |       |
| β (Mediator->Outcome)                                  |                                |       |       | 0.042                         | 0.013 | 0.001 | 0.022             | 0.014 | 0.109 | 0.039                                  | 0.014 | 0.005 |
| Indirect effect                                        |                                |       |       | -0.031                        | 0.021 | 0.136 | -0.017            | 0.016 | 0.294 | -0.029                                 | 0.02  | 0.147 |
| <u>Proportion of effect mediated</u>                   |                                |       |       | 0.048                         | 0.034 |       | 0.031             | 0.041 |       | 0.100                                  | 2.717 |       |
| Depression (EAT-I)                                     |                                |       |       |                               |       |       |                   |       |       |                                        |       |       |
| α (Obese->Mediator)                                    | 0.208                          | 0.297 | 0.484 |                               |       |       |                   |       |       |                                        |       |       |
| β (Mediator->Outcome)                                  |                                |       |       | -0.019                        | 0.014 | 0.168 | -0.014            | 0.015 | 0.350 | -0.046                                 | 0.013 | 0.001 |
| Indirect effect                                        |                                |       |       | -0.004                        | 0.008 | 0.624 | -0.003            | 0.007 | 0.680 | -0.01                                  | 0.015 | 0.526 |
| <u>Proportion of effect mediated</u>                   |                                |       |       | 0.006                         | 0.012 |       | 0.006             | 0.015 |       | 0.028                                  | 0.306 |       |
| Depression (EAT II)                                    |                                |       |       |                               |       |       |                   |       |       |                                        |       |       |
| α (Obese->Mediator)                                    | 0.954                          | 0.362 | 0.008 |                               |       |       |                   |       |       |                                        |       |       |
| β (Mediator->Outcome)                                  |                                |       |       | -0.059                        | 0.016 | 0.000 | -0.043            | 0.016 | 0.006 | -0.072                                 | 0.015 | 0.000 |
| Indirect effect                                        |                                |       |       | -0.056                        | 0.027 | 0.041 | -0.041            | 0.022 | 0.066 | -0.069                                 | 0.032 | 0.029 |
| <u>Proportion of effect mediated</u>                   |                                |       |       | 0.085                         | 0.049 |       | 0.076             | 0.062 |       | 0.236                                  | 4.204 |       |
| Weight teasing (EAT I)                                 |                                |       |       |                               |       |       |                   |       |       |                                        |       |       |
| α (Obese->Mediator)                                    | 0.833                          | 0.138 | <.001 |                               |       |       |                   |       |       |                                        |       |       |
| β (Mediator->Outcome)                                  |                                |       |       | -0.013                        | 0.038 | 0.734 | 0.043             | 0.037 | 0.241 | -0.002                                 | 0.037 | 0.958 |
| Indirect effect                                        |                                |       |       | -0.011                        | 0.032 | 0.739 | 0.036             | 0.032 | 0.259 | -0.002                                 | 0.031 | 0.958 |
| <u>Proportion of effect mediated</u>                   |                                |       |       | 0.017                         | 0.056 |       | -0.074            | 0.082 |       | 0.005                                  | 0.204 |       |
| Weight teasing (EAT II)                                |                                |       |       |                               |       |       |                   |       |       |                                        |       |       |
| α (Obese->Mediator)                                    | 0.419                          | 0.129 | 0.001 |                               |       |       |                   |       |       |                                        |       |       |
| β (Mediator->Outcome)                                  |                                |       |       | -0.025                        | 0.043 | 0.570 | 0.011             | 0.044 | 0.801 | 0.013                                  | 0.047 | 0.781 |
| Indirect effect                                        |                                |       |       | -0.01                         | 0.02  | 0.611 | 0.005             | 0.02  | 0.813 | 0.005                                  | 0.021 | 0.795 |
| <u>Proportion of effect mediated</u>                   |                                |       |       | 0.016                         | 0.032 |       | -0.009            | 0.048 |       | -0.018                                 | 1.773 |       |
| Bothered by weight teasing from other children (EAT I) |                                |       |       |                               |       |       |                   |       |       |                                        |       |       |
| α (Obese->Mediator)                                    | 1.432                          | 0.146 | 0.000 |                               |       |       |                   |       |       |                                        |       |       |
| β (Mediator->Outcome)                                  |                                |       |       | -0.032                        | 0.033 | 0.334 | 0.01              | 0.034 | 0.762 | -0.028                                 | 0.035 | 0.411 |
| Indirect effect                                        |                                |       |       | -0.046                        | 0.049 | 0.348 | 0.015             | 0.05  | 0.765 | -0.041                                 | 0.051 | 0.423 |
| <u>Proportion of effect mediated</u>                   |                                |       |       | 0.070                         | 0.082 |       | -0.030            | 0.109 |       | 0.119                                  | 1.098 |       |
| Bothered by weight teasing from family members (EAT I) |                                |       |       |                               |       |       |                   |       |       |                                        |       |       |
| α (Obese->Mediator)                                    | 0.671                          | 0.148 | 0.000 |                               |       |       |                   |       |       |                                        |       |       |
| β (Mediator->Outcome)                                  |                                |       |       | -0.054                        | 0.034 | 0.107 | 0.03              | 0.031 | 0.343 | -0.065                                 | 0.032 | 0.042 |
| Indirect effect                                        |                                |       |       | -0.036                        | 0.025 | 0.151 | 0.02              | 0.022 | 0.371 | -0.044                                 | 0.025 | 0.084 |
| <u>Proportion of effect mediated</u>                   |                                |       |       | 0.055                         | 0.043 |       | -0.041            | 0.052 |       | 0.128                                  | 0.670 |       |

Note. α: effect of adolescent body mass index >95th percentile for age and sex on the mediator at EAT-I or EAT-II. β: effect of mediator on the outcome controlling for adolescent body mass index >95th

percentile. Indirect effect: effect of adolescent body mass index >95th percentile for age and sex on the outcome through the mediator. \* Adjusted for baseline race/ethnicity, socioeconomic status, and baseline age.
